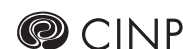

# Review and meta-analysis of usage of ginkgo as an adjunct therapy in chronic schizophrenia

Vidhi Singh<sup>1</sup>, Surendra P. Singh<sup>2</sup> and Kelvin Chan<sup>3</sup>

<sup>1</sup> MediWare Computer Software Engineering, Wolverhampton, West Midlands, UK

<sup>2</sup> Mental Health Directorate, Wolverhampton City Primary Care Trust and University of Wolverhampton, Wolverhampton, West Midlands, UK

<sup>3</sup> University of Wolverhampton, Wolverhampton, West Midlands, UK

## Abstract

This study aimed to review the roles of antioxidants in the pathophysiology of schizophrenia, whether the properties of ginkgo can ameliorate symptoms of this illness, and evaluate available literature to test this assumption. This review is based upon published works on antioxidants and ginkgo. A primary electronic search for meta-analysis on the usage of ginkgo or its derived products in schizophrenia was conducted using Pubmed, Cochrane Library, EMBASE, CINAHL, PsycINFO and AMED. Inclusion criteria were: criteria-based diagnosis of schizophrenia, randomized case assignment, use of ginkgo as an add-on therapy, and assessment using standardized rating scales to measure the state of psychopathology for negative and total symptoms of schizophrenia. Additionally, a detailed review was undertaken to investigate if antioxidants are involved in development of psychotic symptoms in schizophrenia. The six studies that fulfilled the selection criteria were constituted of 466 cases on ginkgo and 362 cases on placebo. They all used the Scale for the Assessment of Negative Symptoms (SANS) to measure negative symptoms, and the Scale for the Assessment of Positive Symptoms (SAPS) or the Brief Psychiatric Rating Scale (BPRS) to measure total symptoms. Difference between ginkgo and control groups from their pre- and post-trial scores and its pooled standard deviation were used to compute standardized mean difference (SMD). Ginkgo as an add-on therapy to antipsychotic medication produced statistically significant moderate improvement (SMD = −0.50) in total and negative symptoms of chronic schizophrenia. Ginkgo as add-on therapy ameliorates the symptoms of chronic schizophrenia. The role of antioxidants in pathogenesis of schizophrenia has also been explored.

Received 11 June 2009; Reviewed 22 July 2009; Revised 30 July 2009; Accepted 17 August 2009;

First published online 24 September 2009

**Key words:** Antioxidants, chronic schizophrenia, EGb, ginkgo, meta-analysis.

## Background and hypothesis

It is interesting to note that since ancient times traditional Chinese medicine has used ginkgo leaves and its fruit to treat brain disorders. *Ginkgo biloba* L. (family Ginkgoaceae) known as living fossil has grown in China for more than 150 million yr (McKenna *et al.* 2002). Similarly, usage of medicinal plants has been well documented in the Ayurvedic text of Rig-veda and Atharv-veda around 5000 B.C. (Mukherjee & Wahile, 2006) and further expanded in the early works by Attreya, Dhanwantary, Charak and Sushrut among many others in the first millennium B.C. Use of herbal preparations in the West also has its roots in ancient civilizations of the Middle East, Egypt, Greece and

Rome (Wicke, 1998). In the East, there are a number of established medical institutes training physicians in these methods of treatment. Ayurvedic and Chinese medicines are part of their public and private health-care systems, and are well accepted and appreciated by the local population; sometimes this is the only form of treatment available through traditional family trained practitioners. In the West, over the past 20 yr ginkgo has gained popularity for treatment to improve peripheral and cerebral circulatory disturbances, including claudication and memory impairment (Hopfenmüller, 1994; Kleijnen & Knipschild, 1992). Ginkgo tops the list of herbal medicine sales in the USA (Koerner, 2007; O'Hara *et al.* 1998).

## Ginkgo – as an antioxidant and immunostimulatory agent

Chemical compounds (e.g. hydrogen peroxide), which can oxidize other molecules or promote the formation

Address for correspondence: Dr S. P. Singh, Steps to Health, Mental Health Directorate, Wolverhampton City Primary Care Trust, Wolverhampton, West Midlands WV10 9TH, UK.

Tel.: +44 1902 445852 Fax: +44 1902 444 514,

Email: Dr.S.Singh@wlv.ac.uk

of other oxidizing agents are named pro-oxidants. Pro-oxidants with unpaired electrons are named free radicals and these unstable electrons make the compound highly reactive. Pro-oxidants without unpaired electrons are known as non-radical pro-oxidants. Free radicals are produced during the aerobic phase of metabolic cycles; their half-life can last from a nano-second to few seconds and have damaging effects on living cells. The presence of antioxidants prevents or delays such an oxidation process. The antioxidant defence system in living cells is comprised of enzymes removing free radicals, e.g. superoxide dismutase (SOD), catalase, or glutathione peroxidase; proteins that minimize the availability of pro-oxidants such as transferrin and hepatoglobulins; heat-shock proteins produced within cells as a result of stress and then influence the functions of other regulatory proteins; and scavenger molecules such as  $\alpha$ -tocopherol, ascorbic acid, or glutathione acting on reactive oxygen species (ROS) and reactive nitrogen species (RNS).

The term oxidant stress refers to an imbalance when production of pro-oxidant activity exceeds the capability of the anti-oxidant defence system. This oxidant stress has been implicated in the pathogenesis of several disorders (Halliwell & Gutteridge, 1990). Antioxidants are chemicals that reduce this oxidative stress (Dabiri *et al.* 1994) and can be classified into hydrophilic and lipophilic types depending on their solubility. It is uncertain if the ratio or quantity of these two types of antioxidants and their interaction with gallic acid in plant-derived products (USDA, 2007) can account for their estimated differential properties, if any.

In experimental situations on rat brains, there are reports that up-regulation of SOD plays a protective role in hippocampal ischaemia (Chandrasekaran *et al.* 2001; Wengenack *et al.* 1997) and glutamate neurotoxicity (Schwartz *et al.* 1998). Ginkgo has been found to be effective in the treatment of cerebral insufficiency (Kleijnen & Knipschild, 1992) and Alzheimer's disease (Andrieu *et al.* 2008; Knapp *et al.* 1994; Le Bars *et al.* 1997). Antioxidant agents are reported to have a mediating role in the prevention of cell damage in the ageing brain (Oyama *et al.* 1994). There are animal studies to support its protective role on cardiomyocytes (Schneider *et al.* 2008), intestinal inflammation (Kotakadi *et al.* 2008), liver carcinogenesis (Dias *et al.* 2008), intermittent claudication (Pittler & Ernst, 2000), hippocampal loss (Takuma *et al.* 2007) and other neuronal damage (Augustin *et al.* 2009; Rojas *et al.* 2008; Saleem *et al.* 2008). Ginkgo has antioxidant properties (MacLennan *et al.* 2002) and has been found to improve brain circulation at the microvascular level

(Kubota *et al.* 2001; Sun *et al.* 2003; Yan *et al.* 2008). Negative symptoms in schizophrenia seem to have underlying cognitive deficits (Rector *et al.* 2005; Spoletini *et al.* 2009) and it is logical to assume that ginkgo as an antioxidant may positively contribute to treatment of this disorder.

There are reports of raised levels of SOD in schizophrenia (Abdalla *et al.* 1986; Reddy *et al.* 1991; Zhang *et al.* 2001a,b) and a reduction after treatment with ginkgo as an add-on therapy (Zhou *et al.* 1999). Increased SOD may appear to be a compensatory mechanism in response to increased oxidative stress (Lohr *et al.* 2003; Yao *et al.* 2001). Vitamin E, a potent antioxidant, can also reduce the severity of positive symptoms in schizophrenia (Lohr & Browning, 1995). These corollaries have led to speculation that oxidative stress may have a pathophysiological role (Herken *et al.* 2001) and its defence mechanisms are impaired in schizophrenia (Ranjekar *et al.* 2003).

Dopamine and norepinephrine activities are associated with an increase in the production of free radicals (Lohr, 1991; Lohr & Browning, 1995). This, in turn, can result in destruction of phospholipids and an alteration in the viscosity of cell membranes causing further impairment of serotonergic and catecholaminergic receptor functions. Typical antipsychotic medications mediate their therapeutic effect by blocking dopamine hyperactivity to treat positive symptoms of schizophrenia. The actions of atypical antipsychotic drugs are probably mediated through different and more than one neuroregulatory system (Butini *et al.* 2009; Meltzer, 2002), and may be slightly superior in the treatment of schizophrenia (Kronig *et al.* 1995; Leucht *et al.* 1999; Möller, 1993). Ginkgo can increase synaptosomal uptake of 5-HT (Ramassamy *et al.* 1992) similar to some of the atypical antipsychotic medications (Philibin *et al.* 2009). Antioxidant treatment of schizophrenia can reduce the damaging effects of free radicals (Zhang *et al.* 2005). Pre-treatment with ginkgo also reduces amphetamine-induced hyperactivity (Trovero *et al.* 1999). Antipsychotic medications may possess D<sub>2</sub>- and D<sub>4</sub>-mediated neuroprotection dependent on cysteine-aspartic acid proteases (caspase) rather than ROS-dependent mechanisms (Bastianetto *et al.* 2006). It is possible that the introduction of ROS-dependent neuroprotective intervention may bring additional benefits to schizophrenia patients.

Schizophrenia may also be associated with changes in the immune system (Chittiprol *et al.* 2009; Müller *et al.* 1999, 2000). Some of the important immunoprotective mechanisms are mediated through CD<sup>+</sup> in human T cells, CD4<sup>+</sup> in TH1 and TH2 cells and IL-2 as the T-cell growth factor activated by CD4<sup>+</sup> present

in TH1. All of these immunostimulatory components (T cells, CD3+, CD4+, CD4+/CD8+ ratio and IL-2) have been found to be lower and the SOD level higher in chronic schizophrenia when compared to a healthy control group (Sperner-Unterwieser *et al.* 1999; Zhang *et al.* 2006a). Treatment with ginkgo increases CD3+, CD4+, IL-2 secreting cells, CD4+/CD8+ ratio, and decreases SOD levels (Zhang *et al.* 2006a). These findings indicate that ginkgo may possess immunostimulatory properties. There are also studies that report differential effects on T-cell proliferation (Tang *et al.* 2006).

As indicated above, antioxidants may have mechanisms of action through more than one target, and there may exist an interaction between excess free-radical production and a decrease in immune function in schizophrenia. Ginkgo as a potent antioxidant and immunostimulator should have beneficial effects in the treatment of schizophrenia (Zhang *et al.* 2006b). This study examines the biological properties of ginkgo in relation to known and assumed aetiopathogenesis of schizophrenia and hence negative results are not the focus of this review. Whether or not these modes of action are general or specific is also far from certain.

A study conducted in the UK found up to 50-fold variability in antioxidant activities of ginkgo preparations available from different manufacturers (Mantle *et al.* 2003). So far, only a limited number of randomized blind trials testing the efficacy of antioxidants in the treatment of schizophrenia have been carried out. It is unlikely that necessary research grants on this subject will be forthcoming from profit-making organizations, especially for a product which is essentially classified as a nutritional supplement. Research on herbal products is further hampered by complexities arising from various national and international biodiversity rules and regulations. There are also inherent limitations in standardizing the formulation, production and identification of active ingredients from plant products (Ganzera *et al.* 2001).

EGb is a compound derived from dried ginkgo leaves and is manufactured through the adaptation of standardized techniques. In general the chemical constituents of ginkgo leaves and seeds are essentially the same, but proportions of its constituents vary slightly. Both contain flavonoids such as ginkgetin, bilobetin, quercetin, kaempferol and isohamnetin. Other constituents are terpene, flavoglycosides (ginkgo heterosides), anthocyanins, lactones, procyanthocyanins and ginkgolic acid. Flavonoids are supposed to have antioxidant activity (Köse & Doğan, 1995; Marcocci *et al.* 1994), whilst terpenoids are an antagonist to

platelet-activating factor (Braquet, 1986). The extract is claimed to contain approximately 24% flavone glycosides and 6% terpene lactones. Ginkgolide B and bilobalide from the lactones group respectively constitute 0.8% and 3% of the total EGb extract. Proanthocyanadins, glucose, rhamnose, organic acids, D-glucaric and ginkgolic acids are some of the other constituents (Diamond *et al.* 2000). In the USA it is available as a dietary supplement as Gingold Nature's Way, in France as Tankan, and in Germany as Tebonin and Rökan. It is difficult to synthesize, but can be produced as a standardized mixture from the natural plant product with reliable quality control. Thus the product can be used for efficacy testing in clinical trials. Interestingly, all the trials included in this meta-analysis used EGb.

The interest in the use of medicinal herbs has increased scientific scrutiny and debate of their potential therapeutic use and safety concerns. This has necessitated updates of knowledge on herbal products to enable clinicians and patients to make informed decisions (Chan, 2005). It is well known that treatment with antipsychotics alone fail to bring adequate control of symptoms in schizophrenia. The pathophysiology of negative symptoms, which is commonly associated with cognitive deficits (Dickinson & Harvey, 2009) continues to remain an unexplained mystery. It is imperative to summarize the usefulness of ginkgo in the treatment of schizophrenia as an add-on therapy, especially in view of the fact that it is safe, its side-effects are comparable to a placebo (Birks & Evans, 2007), it is not expensive and is available as a food supplement. There is a growing trend of promoting alternative and complementary therapies to expand the list of choices available to users and practitioners.

## Objectives

Schizophrenia is a syndrome with five main subtypes (APA, 2000). Most of these categories, except catatonic subtypes, are chronic in nature. The residual subtype is chronic in nature and mainly characterized by the presence of persistent and refractory negative symptoms. Disorganized and undifferentiated subtypes have a mixture of persistent positive symptoms and predominance of negative symptoms and are typically resistant to treatment. Paranoid subtype is less likely to be characterized by the presence of negative symptoms. In addition to general psychopathology, delusions, hallucinations, altered psychomotor activity and thought disorders are grouped under positive symptoms; and withdrawn behaviour, impaired abstract

thinking, lack of spontaneity and flow of conversations and stereotyped thinking are grouped under negative symptoms. Since studies on specific diagnostic categories may be very few, the decision was taken to focus on trials that included cases with chronic symptoms of schizophrenia despite adequate intervention with antipsychotic medications. An earlier review was conducted by the Cochrane Group (Rathbone *et al.* 2005) in 2005 and then republished in 2007 (Rathbone *et al.* 2007).

Clinicians tend to use polypharmacy in 50% or more of their cases (Faries *et al.* 2005; Pandurangi & Dalkilic, 2008) in a desperate attempt to treat chronic and/or resistant symptoms of schizophrenia. This practice is prevalent despite lack of conclusive evidence and against the best practice guidelines (Patrick *et al.* 2006). The present study also aimed to explore the association of responsiveness of add-on therapies with age of onset, duration of illness, age when entered into trials, dose of antipsychotic medications and ginkgo, baseline severity of symptoms, duration of intervention and gender differences.

### Data source

The first stage of the strategy was: (1) electronic search of relevant databases, (2) tracing the references of PubMed web pages linked to individual abstracts of previously searched articles, and (3) checking cross-references for additional relevant studies. All randomized, controlled trials on schizophrenia using drug interventions were searched in title and abstract in databases from PubMed, Cochrane Library, EMBASE, CINAHL, PsycINFO and AMED. Other databases which were also searched included Chinese Clinical Trials Register (ChiCTR), ilib, Traditional Chinese Medicine Literature Analysis and Retrieval System, the China National Knowledge Infrastructure database, and the Chinese Biomedical database.

### Study selection

The syntax for the PubMed search was '(Schizophrenia[MeSH]) AND (Ginkgo biloba[MeSH]) Limits: Humans, Clinical Trial, Randomized Controlled Trial, Controlled Clinical Trial'. Out of 14 search results, eight (Atmaca *et al.* 2005; Doruk *et al.* 2008; Lin *et al.* 2007; Luo *et al.* 1997; Zhang *et al.* 2001a,b, 2006b; Zhou *et al.* 1999) came from the PubMed database, three (Knabe, 2002; Werneke, 2008; Werneke *et al.* 2006) from other electronic databases, and three (Chen *et al.* 1997; Meng *et al.* 1996; Xu *et al.* 2002) from cross-referencing of the electronically searched articles. Out

**Table 1.** Study selection process

|                                                            | Publications |
|------------------------------------------------------------|--------------|
| Electronic search using specified search criteria          | 11           |
| Manual search                                              | 3            |
| Not relevant to the subject                                | −2           |
| Excluded as studies were not of primary type, e.g. reviews | −3           |
| Excluded as studies were suspected of using duplicate data | −2           |
| Studies selected for detailed evaluation                   | 7            |
| Studies that met inclusion and exclusion criteria          | 6            |

of these, one was a case report (Lin *et al.* 2007), one (Zhang *et al.* 2006b) was unrelated to the subject matter, and three (Knabe, 2002; Werneke, 2008; Werneke *et al.* 2006) were review publications. There were three publications by the same group of authors at the same centre with very similar methodologies and an overlapping dataset. The main author had been successfully contacted earlier regarding his publications with positive feedback. During the stage of analysis, doubt arose if their subsequent publications included part of data from their previous studies. Attempts to contact the author for further clarification did not materialize and hence therefore only one (Zhang *et al.* 2001b) of those three publications (Zhang *et al.* 2001a,b; Zhou *et al.* 1999) was included. Accordingly a final list of seven studies were deemed suitable for further evaluation (Atmaca *et al.* 2005; Chen *et al.* 1997; Doruk *et al.* 2008; Luo *et al.* 1997; Meng *et al.* 1996; Xu *et al.* 2002; Zhang *et al.* 2001b). From this list of seven articles, four were in Chinese language and were translated by one of the authors (K.C.) who is fully conversant in written and spoken Chinese. One of the articles (Chen *et al.* 1997) included a mixture of more than one active herbal ingredient and hence was excluded from the analysis. The process of selection is displayed in the Table 1. There were six studies (Atmaca *et al.* 2005; Doruk *et al.* 2008; Luo *et al.* 1997; Meng *et al.* 1996; Xu *et al.* 2002; Zhang *et al.* 2001b) that fulfilled the inclusion and exclusion criteria, and were therefore selected for this review and analysis.

Inclusion criteria were use of ginkgo as add-on therapy in schizophrenia where response of treatment was monitored using standardized negative and total symptom rating scales, e.g. Scale for the Assessment of Negative Symptoms (SANS) and Scale for the Assessment of Positive Symptoms (SAPS; Andreasen,

1990), Positive and Negative Symptom Scale (PANSS; Kay *et al.* 1987), and Brief Psychiatric Rating Scale (BPRS; Overall & Gorham, 1962). Abstracts of all selected articles were further screened, first, by two authors to ascertain inclusion criteria for robustness of structured diagnostic methods or application of diagnostic criteria, use of valid rating scales before and after the trial, randomization and presence of a control group. For negative symptoms, order of preference for scale was SANS, PANSS negative subscale, and BPRS negative subscale; and for scores of total psychopathology PANSS, BPRS, and SAPS. Total scores on BPRS and SAPS may not cover the same domains but they still have modest correlation,  $r=0.61$  (Gur *et al.* 1991), and hence in the absence of BPRS scores the total score was treated as equivalent to the score on SAPS. Exclusion criteria were the use of ECT and transcranial magnetic stimulation, studies on rapid tranquilization as a method of research intervention, and duration of treatment limited to <2 wk.

### Data extraction

Difference of means and standard deviation from baseline to end of intervention scores on both total and negative symptom rating scales individually in each arm of the experimental and control groups were the minimum dataset necessary for statistical analysis. In absence of fixed dosing schedules, mean or median of titrated or flexible dose regimens were used to calculate the baseline dose of antipsychotic medication. This dose was converted to chlorpromazine equivalent daily defined dose (DDD) applying WHO DDD criteria (WHO, 2009). The remaining incomplete values were obtained using imputation techniques.

The dataset extracted for each study is as follows – dose of baseline antipsychotic medications, dose of add-on ginkgo preparation, standardized weighted mean (SWM) of baseline score for total and negative symptoms, mean age of onset in years, mean duration of illness in years, mean age of patients in study, duration of trial in weeks, proportion of males in sample, number of patients in add-on drug group, number of patients in placebo group, and standardized mean difference (SMD) of scores on negative and total symptom rating scales from baseline to end of trial in ginkgo and placebo groups and their standard deviations.

All studies finally selected for analysis had their scores rated on SANS for negative symptoms, and BPRS or SAPS for scores on total psychopathology. Severity of baseline symptoms was calculated as the ratio between overall baseline mean symptom score of

the total sample with its standard deviation. In the absence of overall baseline mean in the published results, it was determined as ratio between weighted mean of combined experimental and control group [equation (1), Supplementary Appendix, available online] with their pooled standard deviation [equation (2), Supplementary Appendix]. A default value of Pearson's correlation coefficient of  $r=0.5$  was used to calculate pooled standard deviation of repeated measures for control and experimental groups [equation (3), Supplementary Appendix], similar to the approach adopted by others (e.g. Winkley *et al.* 2006). For the non-dependent dataset, the process is defined in equation (6) of the Supplementary Appendix. The SMD was computed to reflect the difference between baseline and end of trial scores for both control and experimental groups.

R statistical software (version 2.7.2; R Development Core Team, 2009) and its meta-package were used for statistical analysis, and its GLM package to explore the regression model. The MICE imputation package (van Buuren & Oudshoorn, 2007) available in R programming language was used to obtain incomplete data. The programming codes for enhanced and structured graphic output were written in R language by one of the authors (V.S.).

### Data synthesis

Summary attributes of the studies are given in Table 2 displaying their essential details and quality rating (Jadad *et al.* 1996).

As depicted in Table 3, all studies used standardized extract of ginkgo as EGb and its dose varied between 120 and 360 mg/d. There was preponderance of males over females, and average age of onset and duration of the illness in the studies was 27 yr and 11 yr, respectively. Minimum duration of trials among all studies was 8 wk. Four of the six trials were conducted in East Asia and the remainder in Eastern Europe. The overall sample size of 828 cases from all six studies is made up of 466 cases in the experimental group using EGb and 362 cases in the control group. The equivalent DDD (WHO, 2009) of baseline antipsychotic doses ranged between 0.73 and 2.08 among the studies.

As shown in the Table 4, the second study (Luo *et al.* 1997) has the largest sample size and has contributed the maximum weight of 26% for the random-effects model for negative symptoms and 61% for the fixed-effect model for total symptoms (Table 5) of schizophrenia. In each experimental and control group, the SMD between post-trial and pre-trial scores

**Table 2.** Studies summary

| Study attributes                 | Meng <i>et al.</i> (1996)                                                                         | Luo <i>et al.</i> (1997)                                  | Zhang <i>et al.</i> (2001 <i>b</i> )                                                                          | Xu <i>et al.</i> (2002)                                                    | Atmaca <i>et al.</i> (2005)       | Doruk <i>et al.</i> (2008)                                                                |
|----------------------------------|---------------------------------------------------------------------------------------------------|-----------------------------------------------------------|---------------------------------------------------------------------------------------------------------------|----------------------------------------------------------------------------|-----------------------------------|-------------------------------------------------------------------------------------------|
| Randomized                       | Yes                                                                                               | Yes                                                       | Yes                                                                                                           | Yes                                                                        | Yes                               | Yes                                                                                       |
| Blinding                         | Double blind                                                                                      | Double blind                                              | Double blind                                                                                                  | Open label                                                                 | Single blind                      | Single blind                                                                              |
| Antipsychotics group             | Mixed                                                                                             | Mixed                                                     | Haloperidol                                                                                                   | Chlorpromazine                                                             | Olanzapine                        | Clozapine                                                                                 |
| Ginkgo compared with ...         | Placebo                                                                                           | Placebo                                                   | Placebo                                                                                                       | Placebo                                                                    | None                              | Placebo                                                                                   |
| Total symptoms scale             | BPRS                                                                                              | BPRS                                                      | BPRS                                                                                                          | SAPS                                                                       | SAPS                              | BPRS                                                                                      |
| Negative symptoms scale          | SANS                                                                                              | SANS                                                      | SANS                                                                                                          | SANS                                                                       | SANS                              | SANS                                                                                      |
| Diagnostic criteria              | ICD-10                                                                                            | ICD-10                                                    | DSM-III-R                                                                                                     | CCMD-2-R                                                                   | DSM-IV                            | DSM-IV                                                                                    |
| Diagnosis                        | Schizophrenia of duration >3 years, in stable state, SANS >50, two patients relapsed during trial | Chronic schizophrenia, SANS >50, BPRS >30, duration >5 yr | Treatment resistant (not responding to two antipsychotics, each for 3 months) schizophrenia of duration >5 yr | Chronic schizophrenia, duration >5 years, stable for 6 months before trial | Schizophrenia, stable for 1 month | Treatment-resistant schizophrenia first treated with clozapine and then entered the trial |
| Score (Jadad <i>et al.</i> 1996) | 3                                                                                                 | 3                                                         | 3                                                                                                             | 2                                                                          | 2                                 | 2                                                                                         |

BPRS, Brief Psychiatric Rating Scale; CCMD-2-R, Chinese Classification of Mental Disorders – Second Edition, Revised; DSM, Diagnostic and Statistical Manual of Mental Disorders; ICD-10, International Classification of Diseases – 10th Revision; SANS, Scale for the Assessment of Negative Symptoms; SAPS, Scale for the Assessment of Positive Symptoms.

**Table 3.** Study attributes

| Author/year                 | Base drug      | Male (%) | Age (yr) | Onset (yr) | Duration (yr) | Trial (wk) |
|-----------------------------|----------------|----------|----------|------------|---------------|------------|
| Meng <i>et al.</i> (1996)   | Chlorpromazine | 50       | 35       | 24         | 11            | 8          |
| Luo <i>et al.</i> (1997)    | Antipsychotic  | 82       | 37       | 29         | 9             | 16         |
| Zhang <i>et al.</i> (2001b) | Haloperidol    | 53       | 44       | 23         | 21            | 12         |
| Xu <i>et al.</i> (2002)     | Chlorpromazine | 79       | 46       | 24         | 11            | 8          |
| Atmaca <i>et al.</i> (2005) | Olanzapine     | 48       | 28       | 22         | 6             | 8          |
| Doruk <i>et al.</i> (2008)  | Clozapine      | 64       | 31       | 21         | 9             | 12         |
| Summary (average)           |                | 74       | 39       | 27         | 11            | 14         |

**Table 4.** Results for EGb as an adjunct therapy for negative symptoms of chronic schizophrenia

| Author/year                 | Base drug                               | Severity | SMD   | S.E. | 95 % CI        | Wt% | OR  |
|-----------------------------|-----------------------------------------|----------|-------|------|----------------|-----|-----|
| Meng <i>et al.</i> (1996)   | Chlorpromazine                          | 4.34     | −1.01 | 0.36 | −1.72 to −0.31 | 11  | 6.3 |
| Luo <i>et al.</i> (1997)    | Antipsychotic                           | 3.89     | −0.50 | 0.09 | −0.68 to −0.32 | 26  | 2.5 |
| Zhang <i>et al.</i> (2001b) | Haloperidol                             | 3.46     | −0.12 | 0.19 | −0.50 to 0.25  | 20  | 1.2 |
| Xu <i>et al.</i> (2002)     | Chlorpromazine                          | 3.08     | −0.67 | 0.21 | −1.07 to −0.27 | 19  | 3.4 |
| Atmaca <i>et al.</i> (2005) | Olanzapine                              | 6.40     | 0.37  | 0.38 | −0.37 to 1.10  | 11  | 1.9 |
| Doruk <i>et al.</i> (2008)  | Clozapine                               | 3.42     | −1.10 | 0.33 | −1.75 to −0.44 | 13  | 7.3 |
| Random-effects model        | ( $Q=15.11$ ,<br>d.f. = 5, $p < 0.05$ ) | 3.82     | −0.50 | 0.16 | −0.81 to −0.18 | 100 | 2.7 |

CI, Confidence interval; OR, odds ratio; SMD, standardized mean difference, S.E., standard error of SMD; Wt, weight in percentage.

**Table 5.** Results for EGb as an adjunct therapy for total symptoms of chronic schizophrenia

| Author/year                 | Base drug                              | Severity | SMD   | S.E. | 95 % CI        | Wt% | OR  |
|-----------------------------|----------------------------------------|----------|-------|------|----------------|-----|-----|
| Meng <i>et al.</i> (1996)   | Chlorpromazine                         | 1.12     | −0.15 | 0.34 | −0.81 to 0.52  | 4   | 1.3 |
| Luo <i>et al.</i> (1997)    | Antipsychotic                          | 4.82     | −0.57 | 0.09 | −0.75 to −0.39 | 61  | 2.8 |
| Zhang <i>et al.</i> (2001b) | Haloperidol                            | 3.03     | −0.25 | 0.19 | −0.62 to 0.13  | 14  | 1.6 |
| Xu <i>et al.</i> (2002)     | Chlorpromazine                         | 2.66     | −0.64 | 0.21 | −1.04 to −0.24 | 12  | 3.2 |
| Atmaca <i>et al.</i> (2005) | Olanzapine                             | 4.52     | −0.76 | 0.39 | −1.51 to 0.00  | 3   | 3.9 |
| Doruk <i>et al.</i> (2008)  | Clozapine                              | 6.66     | −0.20 | 0.31 | −0.80 to 0.41  | 5   | 1.4 |
| Fixed-effects model         | ( $Q=5.35$ ,<br>d.f. = 5, $p > 0.05$ ) | 4.25     | −0.50 | 0.07 | −0.64 to −0.36 | 100 | 2.5 |

CI, Confidence interval; OR, odds ratio; SMD, standardized mean difference, S.E., standard error of SMD; Wt, weight in percentage.

were computed. Subsequently, differences between experimental and control groups were obtained in terms of SMD. Based on 13 parameters for each of six studies, out of the 78 required parameters, data were missing for six parameters which required imputation. None of missing data belonged to scores on rating scales.

The studies were heterogeneous ( $Q=15.11$ , d.f. = 5,  $p < 0.05$ ) for negative symptoms and so using the

random-effects model, EGb was found to have moderate effect size in the treatment of negative symptoms of chronic schizophrenia (Fig. 1).

For total symptoms, the heterogeneity test ( $Q=5.35$ , d.f. = 5,  $p > 0.05$ ) was negative and the fixed-effects model demonstrated moderate effect size in favour of add-on treatment for total symptoms (Fig. 2). These effect sizes are marginally superior to the effect of antidepressant medications in the primary treatment

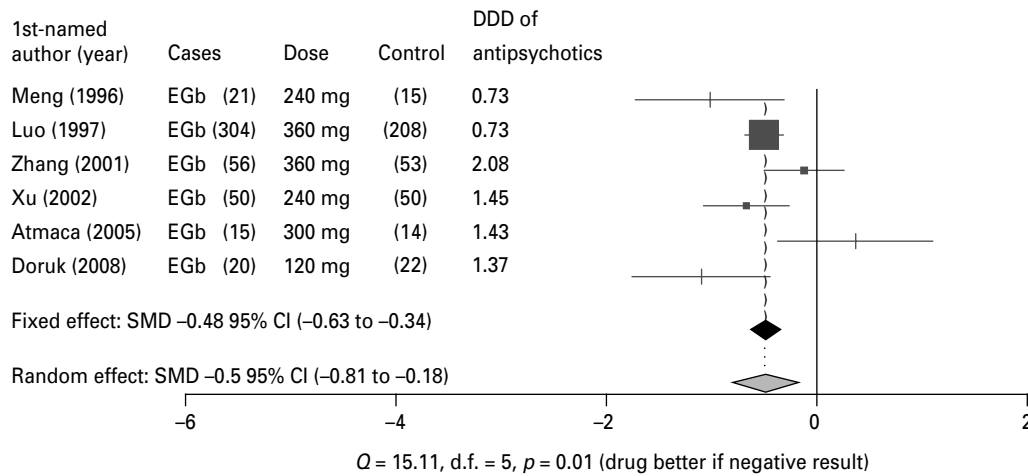

**Fig. 1.** EGb as adjunct therapy for negative symptoms of chronic schizophrenia. DDD, Daily defined dose chlorpromazine equivalent.

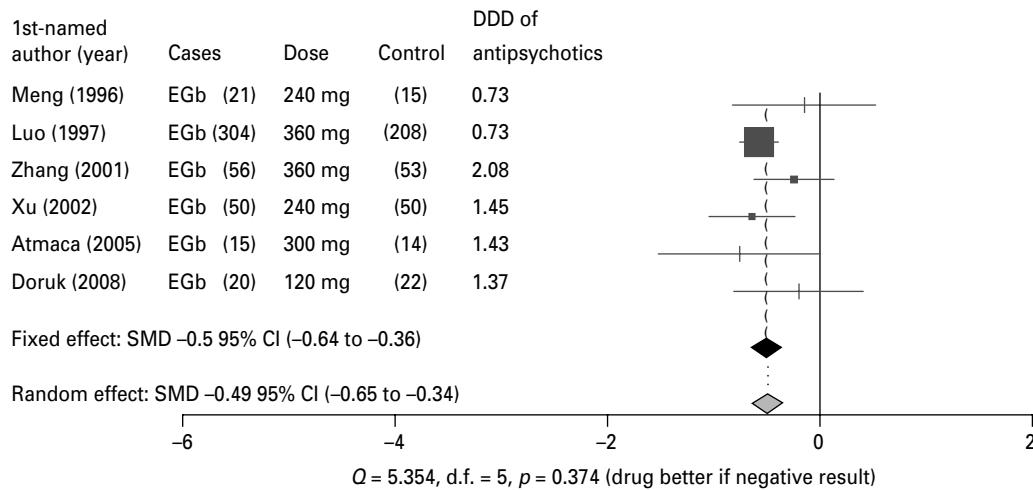

**Fig. 2.** EGb as adjunct therapy for total symptoms of chronic schizophrenia. DDD, Daily defined dose chlorpromazine equivalent.

of depressive illness (Kirsch *et al.* 2008) and within the range of effect sizes reported for second-generation antipsychotics for treatment of schizophrenia (Davis *et al.* 2003).

Stepwise regression using a generalized linear model (GLM) adopting Gaussian distribution between SMDs for negative symptoms with other numerical parameters did not reveal significant association. The same is also applicable for total symptoms.

Subgroup analysis for atypical (clozapine and olanzapine) and typical (chlorpromazine and haloperidol) antipsychotic groups is shown in Table 6. Since clozapine became available in China for clinical use in 1976 (Zhu & Yang, 2008), studies using mixed antipsychotic medications (Luo *et al.* 1997; Meng *et al.* 1996) might have used clozapine as a part of their

treatment regimen and hence they were not assigned to either typical or atypical groups for the purpose of this analysis.

Studies included in this meta-analysis originated either from China or Turkey and a subgroup analysis was performed to test regional differences and is displayed in Table 7.

### Sensitivity analysis

Out of the six studies, EGb was effective in four for negative symptoms and in two for negative symptoms in the treatment of chronic schizophrenia. The estimated effect size of 0.5, assuming 10% spontaneous improvement, yielded an odd ratio of 2.5 (Table 4) and number needed to treat (NNT) of 9 (Schünemann *et al.*



**Table 6.** Typical and atypical subgroup analysis

|                                | Q    | d.f. | p     | Model | SMD   | 95% CI         | p     |
|--------------------------------|------|------|-------|-------|-------|----------------|-------|
| Chlorpromazine and haloperidol |      |      |       |       |       |                |       |
| Negative symptoms              | 3.79 | 1    | >0.05 | FEM   | −0.38 | −0.66 to −0.10 | <0.05 |
| Total symptoms                 | 1.97 | 1    | >0.05 | FEM   | −0.43 | −0.71 to −0.16 | <0.05 |
| Clozapine and olanzapine       |      |      |       |       |       |                |       |
| Negative symptoms              | 8.52 | 1    | <0.05 | REM   | −0.38 | −1.81 to 1.06  | >0.05 |
| Total symptoms                 | 1.28 | 1    | >0.05 | FEM   | −0.42 | −0.89 to 0.06  | >0.05 |

CI, confidence interval; FEM, fixed-effects model; REM, random-effects model; SMD, standardized mean difference.

**Table 7.** Regional variation

|                             | Q    | d.f. | p     | Model | SMD   | 95% CI         | p     |
|-----------------------------|------|------|-------|-------|-------|----------------|-------|
| Studies conducted in Turkey |      |      |       |       |       |                |       |
| Negative symptoms           | 8.52 | 1    | <0.05 | REM   | −0.38 | −1.81 to 1.06  | >0.05 |
| Total symptoms              | 1.28 | 1    | >0.5  | FEM   | −0.42 | −0.89 to 0.06  | >0.05 |
| Studies conducted in China  |      |      |       |       |       |                |       |
| Negative symptoms           | 6.57 | 3    | >0.05 | FEM   | −0.49 | −0.63 to −0.34 | <0.05 |
| Total symptoms              | 3.93 | 3    | >0.05 | FEM   | −0.51 | −0.66 to −0.37 | <0.05 |

CI, confidence interval; FEM, fixed-effects model; REM, random-effects model; SMD, standardized mean difference.

2008), anticipating 13% improvement from baseline severity score. Using alternative  $r$  values did produce different effect size and heterogeneity, but did not have impact on statistical significance for negative symptoms ( $r=0.1$ ,  $SMD=-0.43$ ,  $NNT=11$ ; and  $r=0.9$ ,  $SMD=-0.71$ ,  $NNT=6$ ) and total symptoms ( $r=0.1$ ,  $SMD=-0.38$ ,  $NNT=13$ ; and  $r=0.9$ ,  $SMD=-0.84$ ,  $NNT=5$ ). We tested for publication bias with the assumption that non-significant studies were not published. The 'trim and fill' method revealed no publication bias for negative symptoms or change in its effect size; and two publication bias (Doruk *et al.* 2008; Meng *et al.* 1996), for total symptoms with slight increase in effect size to  $-0.54$ . We also analysed the results assuming that there might be bias in cross-cultural publication even for negative outcomes and found the same result for total symptoms with the same two filled studies; and for negative symptoms, there was a marginal reduction in SMD to  $-0.45$  with one filled study (Doruk *et al.* 2008).

## Conclusion

One of the required standards in clinical trials on the efficacy of treatment is the assurance of the quality of the products being investigated. All trials included in the analysis used standardized ginkgo preparation

EGb as an add-on therapy and were compared against a placebo except in one study (Atmaca *et al.* 2005). Sample selection criteria were consistent with diagnosis of chronic schizophrenia using established criteria. Assessment of change in clinical symptomatology was performed using established rating scales for total and negative symptoms. All trials lasted  $\geq 8$  wk. Three of studies were double blind, two single blind and one was open label. Baseline DDD among these studies varied between a range of about 0.7–2. The overall effect size for treatment of total and negative symptoms are medium (Cohen, 1988) perceived as 'visible to the naked eye' (Coe, 2002). Association of underlying variables with therapeutic outcome could not be established applying regression analysis probably because of the small number of studies in this analysis. The finding of this study is at variance with the previously published meta-analysis for negative symptoms scores on SANS (Rathbone *et al.* 2005, 2007). Some caution should be taken to interpret the result on total score as scores of two studies on SAPS were treated as equivalent to scores on total psychopathology on the ground of high correlation (Gur *et al.* 1991).

Effect sizes for negative symptoms, individually for chlorpromazine and clozapine studies, were statistically significant while those of olanzapine and

haloperidol were not. For the total symptoms, it was only chlorpromazine group which responded to the add-on therapy. Efficacy of the add-on therapy was also analysed if difference emerged for typical *vs.* atypical subgroups (Table 6). This showed that EGb is effective only when added to typical antipsychotic medications. This finding should be treated only as indicator due to sample size limitation in the atypical subgroup.

Around 90% of the total sample belonged to the Chinese population with the remainder coming from Turkey. Further analysis of data revealed statistically significant moderate effect size for both negative and total symptoms for studies conducted in China (Table 7). One of the explanations for lack of significant effect size for studies conducted in Turkey might be attributed to the small sample size in this subgroup.

The interpretation of results should take account of heterogeneity among the trials. For example, one of the studies (Luo *et al.* 1997) with a relatively large sample size did not account for drop-outs of 22 cases in the ginkgo group and 11 in the placebo group and it is uncertain if cases fulfilled the criteria for the treatment of resistant schizophrenia, i.e. failing to respond to two antipsychotics. The severity of total symptoms in one of the six studies (Meng *et al.* 1996) was noticeably lower than the other studies in this review. Another study (Doruk *et al.* 2008) does not give information about duration of treatment with clozapine before inclusion in the trial and progressive improvement in negative symptoms could be attributed to the continuing treatment with clozapine. Two of the studies (Meng *et al.* 1996; Xu *et al.* 2002) did not carry the observation forward despite the drop-outs. Due to limited number of trials, we adopted the modified criteria to include the studies which were not double blind.

Although there are several reviews using ginkgo on various conditions, none applies the meta-analysis technique about its usage in schizophrenia. Despite some limitations as described above, this review appears to be first of its kind to summarize the results of randomized control trials. All included trials were conducted in the Eastern hemisphere where ginkgo is more likely to be used as a traditional medicine. Lack of interest by pharmaceutical companies and various regulations governing biodiversity law may impede initiation of a project on herbal medicines.

Although ginkgo may have therapeutic potential, it is uncertain which of its chemical ingredients or its combinations are ultimately responsible for its therapeutic response. Without further research it will remain uncertain as to whether or not antioxidant

properties alone play a specific role in the aetiopathogenesis of schizophrenia. The unit of the antioxidant properties of a compound is described in terms of oxygen radical absorbance capacity (ORAC), which is equal to units of micromoles of trolox equivalents per 100 g substance in question. A widely used dose of ginkgo of 360 mg from its most potent preparation will give 5000 ORAC a day (Mantle *et al.* 2003). If only ginkgo's antioxidant activity is of exclusive significance then there are other products which can provide similar or better ORAC values. For example, fruit consumption of 'five a day' can give up to 1750 ORAC units, or alternatively, a huge amount of ORAC units can be obtained simply by consuming spiced foods like Indian curries (48504 ORAC) with usual ingredients like clove (314446 ORAC), cinnamon (267536 ORAC), turmeric (159277 ORAC), cumin seeds (76800 ORAC) and kidney beans (8459 ORAC) (USDA, 2007). Further research work is needed to tackle these questions.

This study aimed to assess the effectiveness of ginkgo as an add-on therapy for chronic schizophrenia patients who are already receiving adequate doses of licensed antipsychotic medication of proven efficacy as a main line of treatment. For an add-on product to be of therapeutic relevance it should have an effect size that can be clinically observed and appreciated. Production and marketing of such preparations should have economical and commercial viability similar to that of antidepressants. The role of antipsychotic medication as polypharmacy is far from clear in a sizable proportion of symptomatic patients of chronic schizophrenia. Accordingly, even marginal improvement with add-on treatments has merit parallel to observed effect size from usage of antidepressant medications.

Generally speaking ginkgo appears safe (Birks & Evans, 2007) and whilst its use is justified on the grounds mentioned above; precaution should be taken to monitor side-effects, adverse effects and toxicity. Side-effects are similar to those found in common drugs like nausea, gastric irritation, diarrhoea, headache, dizziness and allergic rashes. Ginkgo acts as an anti-platelet factor and exerts a synergistic effect with the monoamine oxidase inhibitor group of drugs (Diamond *et al.* 2000). Its use should be avoided with warfarin and should be discontinued before surgical procedures. A chemical called ginkgotxin is found in uncooked ginkgo seeds and if consumed in large quantities can induce seizure activity (NIH, 2008). The average monthly drug cost for each diagnosed case of schizophrenia varies between £8 for typical antipsychotics to £280 for atypical antipsychotics like

clozapine (Lewis *et al.* 2006) and the cost of 360 mg/d EGb will be £30 to £40. Usage of EGb in clinical practice may also broaden the choice for patients, physicians, psychiatrist and other mental health professionals.

The findings of this review have limitations due to the limited number of studies and relatively small sample sizes. The role of antioxidants in the pathophysiology of schizophrenia warrants further clinical trials as well as laboratory-based research work. There is a need to exploit the expertise of native users and traditional practitioners. Currently, we are some distance from achieving these objectives; however, people and cultures who have belief in and evidence of experience from usage of ginkgo will continue to use this for the foreseeable future.

### Main learning points

- (1) EGb has statistically significant moderate therapeutic benefit with acceptable safety limits as an add-on therapy for treatment of total and negative symptoms of chronic schizophrenia.
- (2) Available evidence indicates that, with some precautions, ginkgo is safe to use.
- (3) Inclusion of this drug in local and national formularies will expand the choice available to patients and practitioners.

### Suggestions

- (1) More randomized, double-blind trials in chronic schizophrenia with control on confounders that may influence antioxidant properties of ginkgo.
- (2) Further research in the area of drug interactions with psychotropic medications.
- (3) Further research is needed in the area of phytochemistry and the development of alternative cost-effective formulations.

### Note

Supplementary material accompanies this paper on the Journal's website (<http://journals.cambridge.org/pnp>).

### Acknowledgements

The authors gratefully acknowledge the assistance of Dr N. Kar, and the support provided by the Quality of Life Research and Development Foundation in preparation of the manuscript.

### Statement of Interest

None.

### References

- Abdalla DS, Monteiro HP, Oliveira JA, Bechara EJ** (1986). Activities of superoxide dismutase and glutathione peroxidase in schizophrenic and manic-depressive patients. *Clinical Chemistry* **32**, 805–807.
- APA** (2000). *Diagnostic Criteria from DSM-IV-TR*, 4th edn. Washington, DC: American Psychiatric Association.
- Andreassen NC** (1990). Methods for assessing positive and negative symptoms. *Modern Problems of Pharmacopsychiatry* **24**, 73–88.
- Andrieu S, Ousset P, Coley N, Ouzid M, et al.** (2008). GuidAge study: a 5-year double blind, randomised trial of EGb 761 for the prevention of Alzheimer's disease in elderly subjects with memory complaints. I. rationale, design and baseline data. *Current Alzheimer Research* **5**, 406–415.
- Atmaca M, Tezcan E, Kuloglu M, Ustundag B, et al.** (2005). The effect of extract of ginkgo biloba addition to olanzapine on therapeutic effect and antioxidant enzyme levels in patients with schizophrenia. *Psychiatry and Clinical Neurosciences* **59**, 652–656.
- Augustin S, Rimbach G, Augustin K, Schliebs R, et al.** (2009). Effect of a short- and long-term treatment with Ginkgo biloba extract on amyloid precursor protein levels in a transgenic mouse model relevant to Alzheimer's disease. *Archives of Biochemistry and Biophysics* **481**, 177–182.
- Bastianetto S, Danik M, Mennicken F, Williams S, et al.** (2006). Prototypical antipsychotic drugs protect hippocampal neuronal cultures against cell death induced by growth medium deprivation. *BMC Neuroscience* **7**, e28.
- Birks J, Evans JG** (2007). Ginkgo biloba for cognitive impairment and dementia. *Cochrane Database of Systematic Reviews*. Issue 3, Art. No. CD003120 (<http://www.ncbi.nlm.nih.gov/pubmed/17443523>). Accessed 5 June 2009.
- Braquet P** (1986). Proofs of involvement of PAF-acether in various immune disorders using BN 52021 (ginkgolide B): a powerful PAF-acether antagonist isolated from Ginkgo biloba L. *Advances in Prostaglandin, Thromboxane, and Leukotriene Research* **16**, 179–198.
- van Buuren S, Oudshoorn C** (2007). Multiple imputation MICE, version 1.21 (<http://cran.r-project.org/web/packages/mice/index.html>).
- Butini S, Gemma S, Campiani G, Franceschini S, et al.** (2009). Discovery of a new class of potential multifunctional atypical antipsychotic agents targeting dopamine D3 and serotonin 5-HT1A and 5-HT2A receptors: design, synthesis, and effects on behavior. *Journal of Medicinal Chemistry* **52**, 151–169.
- Chan K** (2005). Chinese medicinal materials and their interface with Western medical concepts. *Journal of Ethnopharmacology* **96**, 1–18.
- Chandrasekaran K, Mehrabian Z, Spinnewyn B, Drieu K, et al.** (2001). Neuroprotective effects of bilobalide, a

- component of the Ginkgo biloba extract (EGb 761), in gerbil global brain ischemia. *Brain Research* **922**, 282–292.
- Chen Y, He A, Chen L** (1997). The clinical observation on 120 cases of schizophrenic negative symptoms treated with 'Xin Shen' mixture. *Journal of University Traditional Chinese Medicine* **22**, 19–21.
- Chittiprol S, Venkatasubramanian G, Neelakantachar N, Allha N, et al.** (2009). Beta2-microglobulin abnormalities in antipsychotic-naïve schizophrenia: evidence for immune pathogenesis. *Brain, Behavior, and Immunity* **23**, 189–192.
- Coe R** (2002). It's the effect size, stupid: what effect size is and why it is important. (<http://www.leeds.ac.uk/educol/documents/00002182.htm>). Accessed 5 June 2009.
- Cohen J** (1988). *Statistical Power Analysis for the Behavioral Sciences*, 2nd edn. Hillsdale, NJ: L. Erlbaum Associates.
- Dabiri LM, Pasta D, Darby JK, Mosbacher D** (1994). Effectiveness of vitamin E for treatment of long-term tardive dyskinesia. *American Journal of Psychiatry* **151**, 925–926.
- Davis JM, Chen N, Glick ID** (2003). A meta-analysis of the efficacy of second-generation antipsychotics. *Archives of General Psychiatry* **60**, 553–564.
- Diamond BJ, Shiflett SC, Feiwei N, Matheis RJ, et al.** (2000). Ginkgo biloba extract: mechanisms and clinical indications. *Archives of Physical Medicine and Rehabilitation* **81**, 668–678.
- Dias MC, Rodrigues MAM, Reimberg MCH, Barbisan LF** (2008). Protective effects of Ginkgo biloba against rat liver carcinogenesis. *Chemico-Biological Interactions* **173**, 32–42.
- Dickinson D, Harvey PD** (2009). Systemic hypotheses for generalized cognitive deficits in schizophrenia: a new take on an old problem. *Schizophrenia Bulletin* **35**, 403–414.
- Doruk A, Uzun O, Ozşahin A** (2008). A placebo-controlled study of extract of Ginkgo biloba added to clozapine in patients with treatment-resistant schizophrenia. *International Clinical Psychopharmacology* **23**, 223–227.
- Faries D, Ascher-Svanum H, Zhu B, Correll C, et al.** (2005). Antipsychotic monotherapy and polypharmacy in the naturalistic treatment of schizophrenia with atypical antipsychotics. *BMC Psychiatry* **5**, e26.
- Ganzer M, Zhao J, Khan IA** (2001). Analysis of terpenelactones in Ginkgo biloba by high performance liquid chromatography and evaporative light scattering detection. *Chemical & Pharmaceutical Bulletin* **49**, 1170–1173.
- Gur RE, Mozley PD, Resnick SM, Levick S, et al.** (1991). Relations among clinical scales in schizophrenia. *American Journal of Psychiatry* **148**, 472–478.
- Halliwell B, Gutteridge JM** (1990). Role of free radicals and catalytic metal ions in human disease: an overview. *Methods in Enzymology* **186**, 1–85.
- Herken H, Uz E, Ozyurt H, Söğüt S, et al.** (2001). Evidence that the activities of erythrocyte free radical scavenging enzymes and the products of lipid peroxidation are increased in different forms of schizophrenia. *Molecular Psychiatry* **6**, 66–73.
- Hopfenmüller W** (1994). Evidence for a therapeutic effect of Ginkgo biloba special extract. Meta-analysis of 11 clinical studies in patients with cerebrovascular insufficiency in old age [in German]. *Arzneimittel-Forschung* **44**, 1005–1013.
- Jadad AR, Moore RA, Carroll D, Jenkinson C, et al.** (1996). Assessing the quality of reports of randomized clinical trials: is blinding necessary? *Controlled Clinical Trials* **17**, 1–12.
- Kay SR, Fiszbein A, Opler LA** (1987). The positive and negative syndrome scale (PANSS) for schizophrenia. *Schizophrenia Bulletin* **13**, 261–276.
- Kirsch I, Deacon BJ, Huedo-Medina TB, Scoboria A, et al.** (2008). Initial severity and antidepressant benefits: a meta-analysis of data submitted to the Food and Drug Administration. *PLoS Medicine* **5**, e45.
- Kleijnen J, Knipschild P** (1992). Ginkgo biloba for cerebral insufficiency. *British Journal of Clinical Pharmacology* **34**, 352–358.
- Knable MB** (2002). Extract of Ginkgo biloba added to haloperidol was effective for positive symptoms in refractory schizophrenia. *Evidence-Based Mental Health* **5**, 90.
- Knapp MJ, Knopman DS, Solomon PR, Pendlebury WW, et al.** (1994). A 30-week randomized controlled trial of high-dose tacrine in patients with Alzheimer's disease. The Tacrine Study Group. *Journal of the American Medical Association* **271**, 985–991.
- Koerner B** (2007). How did ginkgo biloba become the top-selling brain enhancer? *Slate Magazine* (<http://www.slate.com/id/2165042/>). Accessed 5 June 2009.
- Köse K, Doğan P** (1995). Lipoperoxidation induced by hydrogen peroxide in human erythrocyte membranes. 1. Protective effect of Ginkgo biloba extract (EGb 761). *Journal of International Medical Research* **23**, 1–8.
- Kotakadi VS, Jin Y, Hofseth AB, Ying L, et al.** (2008). Ginkgo biloba extract EGb 761 has anti-inflammatory properties and ameliorates colitis in mice by driving effector T cell apoptosis. *Carcinogenesis* **29**, 1799–1806.
- Kronig MH, Munne RA, Szymanski S, Safferman AZ, et al.** (1995). Plasma clozapine levels and clinical response for treatment-refractory schizophrenic patients. *American Journal of Psychiatry* **152**, 179–182.
- Kubota Y, Tanaka N, Umegaki K, Takenaka H, et al.** (2001). Ginkgo biloba extract-induced relaxation of rat aorta is associated with increase in endothelial intracellular calcium level. *Life Sciences* **69**, 2327–2336.
- Le Bars PL, Katz MM, Berman N, Itil TM, et al.** (1997). A placebo-controlled, double-blind, randomized trial of an extract of Ginkgo biloba for dementia. North American EGb Study Group. *Journal of the American Medical Association* **278**, 1327–1332.
- Leucht S, Pitschel-Walz G, Abraham D, Kissling W** (1999). Efficacy and extrapyramidal side-effects of the new antipsychotics olanzapine, quetiapine, risperidone, and sertindole compared to conventional antipsychotics and placebo. A meta-analysis of randomized controlled trials. *Schizophrenia Research* **35**, 51–68.
- Lewis SW, Davies L, Jones PB, Barnes TRE, et al.** (2006). Randomised controlled trials of conventional antipsychotic

- versus new atypical drugs, and new atypical drugs versus clozapine, in people with schizophrenia responding poorly to, or intolerant of, current drug treatment. *Health Technology Assessment (Winchester, England)* **10**, iii–iv, ix–xi, 1–165.
- Lin Y, Chu S, Tsai S** (2007). Association between priapism and concurrent use of risperidone and Ginkgo biloba. *Mayo Clinic Proceedings. Mayo Clinic* **82**, 1289–1290.
- Lohr JB** (1991). Oxygen radicals and neuropsychiatric illness. Some speculations. *Archives of General Psychiatry* **48**, 1097–1106.
- Lohr JB, Browning JA** (1995). Free radical involvement in neuropsychiatric illnesses. *Psychopharmacology Bulletin* **31**, 159–165.
- Lohr JB, Kuczenski R, Niculescu AB** (2003). Oxidative mechanisms and tardive dyskinesia. *CNS Drugs* **17**, 47–62.
- Luo HC, Shen YC, Meng FQ** (1997). Therapeutic effect of shuxuening combining neuroleptics for the treatment of chronic schizophrenia – a double blind study [in Chinese]. *Zhongguo Zhong Xi Yi Jie He Za Zhi Zhongguo Zhongxiyi Jiehe Zazhi = Chinese Journal of Integrated Traditional and Western Medicine/Zhongguo Zhong Xi Yi Jie He Xue Hui, Zhongguo Zhong Yi Yan Jiu Yuan Zhu Ban* **17**, 139–142.
- MacLennan KM, Darlington CL, Smith PF** (2002). The CNS effects of Ginkgo biloba extracts and ginkgolide B. *Progress in Neurobiology* **67**, 235–257.
- Mantle D, Wilkins RM, Gok MA** (2003). Comparison of antioxidant activity in commercial Ginkgo biloba preparations. *Journal of Alternative and Complementary Medicine (New York)* **9**, 625–629.
- Marcocci L, Packer L, Droy-Lefaix MT, Sekaki A, et al.** (1994). Antioxidant action of Ginkgo biloba extract EGB 761. *Methods in Enzymology* **234**, 462–745.
- McKenna DJ, Jones K, Hughes K** (2002). *Botanical Medicines: The Desk Reference for Major Herbal Supplements*, 2nd edn. New York: Haworth Herbal Press.
- Meltzer H** (2002). Mechanism of action of atypical antipsychotic drugs. In: Kenneth LD, Dennis C, Joseph TC, Charles N (Eds.), *The Fifth Generation of Progress* (pp. 819–832). Nashville, USA: Lippincott Williams & Wilkins.
- Meng F, Cui Y, Wang S** (1996). A double-blind placebo controlled study of EGB761 in the treatment of chronic schizophrenia. *Journal of Clinical Psychological Medicine* **6**, 339–341.
- Möller HJ** (1993). Neuroleptic treatment of negative symptoms in schizophrenic patients. Efficacy problems and methodological difficulties. *European Neuropsychopharmacology: Journal of the European College of Neuropsychopharmacology* **3**, 1–11.
- Mukherjee PK, Wahile A** (2006). Integrated approaches towards drug development from Ayurveda and other Indian system of medicines. *Journal of Ethnopharmacology* **103**, 25–35.
- Müller N, Riedel M, Ackenheil M, Schwarz MJ** (1999). The role of immune function in schizophrenia: an overview. *European Archives of Psychiatry and Clinical Neuroscience* **249** (Suppl. 4), 62–68.
- Müller N, Riedel M, Gruber R, Ackenheil M, et al.** (2000). The immune system and schizophrenia. An integrative view. *Annals of the New York Academy of Sciences* **917**, 456–467.
- NIH** (2008). Ginkgo biloba. National Center of Complementary and Alternative Medicine: Herbs at a Glance. National Institutes of Health & U.S. Department of Health and Human Services ([http://nccam.nih.gov/health/ginkgo/D290\\_Herbs.pdf](http://nccam.nih.gov/health/ginkgo/D290_Herbs.pdf)). Accessed 5 June 2009.
- O'Hara M, Kiefer D, Farrell K, Kemper K** (1998). A review of 12 commonly used medicinal herbs. *Archives of Family Medicine* **7**, 523–536.
- Overall J, Gorham D** (1962). The brief psychiatric rating scale. *Psychological Reports* **10**, 799–812.
- Oyama Y, Fuchs PA, Katayama N, Noda K** (1994). Myricetin and quercetin, the flavonoid constituents of Ginkgo biloba extract, greatly reduce oxidative metabolism in both resting and Ca(2+)–loaded brain neurons. *Brain Research* **635**, 125–129.
- Pandurangi AK, Dalkilic A** (2008). Polypharmacy with second-generation antipsychotics: a review of evidence. *Journal of Psychiatric Practice* **14**, 345–367.
- Patrick V, Schleifer SJ, Nurenberg JR, Gill KJ** (2006). Best practices: an initiative to curtail the use of antipsychotic polypharmacy in a state psychiatric hospital. *Psychiatric Services (Washington DC)* **57**, 21–23.
- Philibin S, Walentiny D, Vunck S, Prus A, et al.** (2009). Further characterization of the discriminative stimulus properties of the atypical antipsychotic drug clozapine in C57BL/6 mice: role of 5-HT(2A) serotonergic and alpha(1) adrenergic antagonism. *Psychopharmacology* **203**, 303–315.
- Pittler MH, Ernst E** (2000). Ginkgo biloba extract for the treatment of intermittent claudication: a meta-analysis of randomized trials. *American Journal of Medicine* **108**, 276–281.
- Ramassamy C, Christen Y, Clostre F, Costentin J** (1992). The Ginkgo biloba extract, EGB761, increases synaptosomal uptake of 5-hydroxytryptamine: in-vitro and ex-vivo studies. *Journal of Pharmacy and Pharmacology* **44**, 943–945.
- Ranjekar PK, Hinge A, Hegde MV, Ghate M, et al.** (2003). Decreased antioxidant enzymes and membrane essential polyunsaturated fatty acids in schizophrenic and bipolar mood disorder patients. *Psychiatry Research* **121**, 109–122.
- Rathbone J, Zhang L, Zhang M, Xia J, et al.** (2005). Chinese herbal medicine for schizophrenia. *Cochrane Database of Systematic Reviews*. Issue 4, Art. No. CD003444.
- Rathbone J, Zhang L, Zhang M, Xia J, et al.** (2007). Chinese herbal medicine for schizophrenia: cochrane systematic review of randomised trials. *British Journal of Psychiatry: Journal of Mental Science* **190**, 379–384.
- R Development Core Team** (2009). *R: A Language and Environment for Statistical Computing*. Vienna, Austria: R Foundation for Statistical Computing.
- Rector NA, Beck AT, Stolar N** (2005). The negative symptoms of schizophrenia: a cognitive perspective. *Canadian Journal of Psychiatry/Revue Canadienne de Psychiatrie* **50**, 247–257.

- Reddy R, Sahebarao MP, Mukherjee S, Murthy JN** (1991). Enzymes of the antioxidant defense system in chronic schizophrenic patients. *Biological Psychiatry* **30**, 409–412.
- Rojas P, Serrano-García N, Mares-Sámano JJ, Medina-Campos ON, et al.** (2008). EGb761 protects against nigrostriatal dopaminergic neurotoxicity in 1-methyl-4-phenyl-1,2,3,6-tetrahydropyridine-induced Parkinsonism in mice: role of oxidative stress. *European Journal of Neuroscience* **28**, 41–50.
- Saleem S, Zhuang H, Biswal S, Christen Y, et al.** (2008). Ginkgo biloba extract neuroprotective action is dependent on heme oxygenase 1 in ischemic reperfusion brain injury. *Stroke: a Journal of Cerebral Circulation* **39**, 3389–3396.
- Schneider R, Welt K, Aust W, Löster H, et al.** (2008). Cardiac ischemia and reperfusion in spontaneously diabetic rats with and without application of EGb 761: I. cardiomyocytes. *Histology and Histopathology* **23**, 807–817.
- Schünemann HJ, Oxman AD, Vist GE, Higgins JP, et al.** (2008). Interpreting results and drawing conclusions. In: Higgins JPT, Green S (Eds.), *Cochrane Handbook for Systematic Reviews of Interventions* (Wiley Cochrane Series) (pp. 359–384). Chichester, UK: John Wiley and Sons Ltd.
- Schwartz PJ, Reaume A, Scott R, Coyle JT** (1998). Effects of over- and under-expression of Cu,Zn-superoxide dismutase on the toxicity of glutamate analogs in transgenic mouse striatum. *Brain Research* **789**, 32–39.
- Sperner-Unterwieser B, Whitworth A, Kemmler G, Hilbe W, et al.** (1999). T-cell subsets in schizophrenia: a comparison between drug-naïve first episode patients and chronic schizophrenic patients. *Schizophrenia Research* **38**, 61–70.
- Spoletini I, Cherubini A, Di Paola M, Banfi G, et al.** (2009). Reduced fronto-temporal connectivity is associated with frontal gray matter density reduction and neuropsychological deficit in schizophrenia. *Schizophrenia Research* **108**, 57–68.
- Sun B, Zhang J, Wang X, Xia Z, et al.** (2003). Effects of extract of Ginkgo biloba on spasms of the basilar artery and cerebral microcirculatory perfusion in rats with subarachnoid hemorrhage. *Clinical Hemorheology and Microcirculation* **29**, 231–238.
- Takuma K, Hoshina Y, Arai S, Himeno Y, et al.** (2007). Ginkgo biloba extract EGb 761 attenuates hippocampal neuronal loss and cognitive dysfunction resulting from chronic restraint stress in ovariectomized rats. *Neuroscience* **149**, 256–262.
- Tang Y, Xu Y, Zhang Z** (2006). Effects of ginkgo biloba extract on proliferation and apoptosis of T lymphocytes in vitro in rats with asthma [in Chinese]. *Zhongguo Zhong Xi Yi Jie He Za Zhi Zhongguo Zhongxiyi Jiehe Zazhi=Chinese Journal of Integrated Traditional and Western Medicine/Zhongguo Zhong Xi Yi Jie He Xue Hui, Zhongguo Zhong Yi Yan Jiu Yuan Zhu Ban* **26** (Suppl.), 47–50.
- Trovero F, Brochet D, Tassin JP, Drieu K** (1999). Ginkgo biloba extract EGb761 reduces the development of amphetamine-induced behavioral sensitization: effects on hippocampal type II corticosteroid receptors. *Brain Research* **818**, 135–139.
- USDA** (2007). Nutrient Data Laboratory, Agriculture Research Service, US Department of Agriculture, Oxygen radical absorbance capacity (ORAC) of Selected Foods – 2007 (<http://www.ars.usda.gov/SP2UserFiles/Place/12354500/Data/ORAC/ORAC07.pdf>). Accessed 5 June 2009.
- Wengenack TM, Curran GL, Poduslo JF** (1997). Postischemic, systemic administration of polyamine-modified superoxide dismutase reduces hippocampal CA1 neurodegeneration in rat global cerebral ischemia. *Brain Research* **754**, 46–54.
- Werneke U** (2008). Review: adding Chinese herbal medicine to antipsychotics may improve some outcomes in schizophrenia, but more high quality trials are needed. *Evidence-Based Mental Health* **11**, 19.
- Werneke U, Turner T, Priebe S** (2006). Complementary medicines in psychiatry: review of effectiveness and safety. *British Journal of Psychiatry: Journal of Mental Science* **188**, 109–121.
- WHO** (2009). ATC/DDD Index. WHO Collaborating Centre of Drug Statistics Methodology (<http://www.whocc.no/atcddd/indexdatabase/>). Accessed 5 June 2009.
- Wicke R** (1998). Herbal traditions of the Western world compared. *A World History of Herbology and Medical Herbalism: Oppressed Arts* (<http://www.rmhiherbal.org/a/f.ahr1.hist.html#trad-west>). Accessed 5 June 2009.
- Winkley K, Ismail K, Landau S, Eisler I** (2006). Psychological interventions to improve glycaemic control in patients with type 1 diabetes: systematic review and meta-analysis of randomised controlled trials. *British Medical Journal (Clinical Research Edition)* **333**, e65.
- Xu X, Ji Y, He M** (2002). The efficacy of Ginkgo biloba tablet in adjuvant treatment of schizophrenia. *Shanghai Medical and Pharmaceutical Journal* **23**, 456–457.
- Yan F, Zheng Y, Zhao F** (2008). Effects of ginkgo biloba extract EGb761 on expression of RAGE and LRP-1 in cerebral microvascular endothelial cells under chronic hypoxia and hypoglycemia. *Acta Neuropathologica* **116**, 529–535.
- Yao JK, Reddy RD, van Kammen DP** (2001). Oxidative damage and schizophrenia: an overview of the evidence and its therapeutic implications. *CNS Drugs* **15**, 287–310.
- Zhang XY, Tan YL, Cao LY, Wu GY, et al.** (2006a). Antioxidant enzymes and lipid peroxidation in different forms of schizophrenia treated with typical and atypical antipsychotics. *Schizophrenia Research* **81**, 291–300.
- Zhang XY, Zhou DF, Cao LY, Wu GY** (2006b). The effects of Ginkgo biloba extract added to haloperidol on peripheral T cell subsets in drug-free schizophrenia: a double-blind, placebo-controlled trial. *Psychopharmacology* **188**, 12–17.
- Zhang XY, Zhou DF, Cao LY, Wu GY, et al.** (2005). Cortisol and cytokines in chronic and treatment-resistant patients with schizophrenia: association with psychopathology and response to antipsychotics. *Neuropsychopharmacology: Official Publication of the American College of Neuropsychopharmacology* **30**, 1532–1538.
- Zhang XY, Zhou DF, Su JM, Zhang PY** (2001a). The effect of extract of ginkgo biloba added to haloperidol on

- superoxide dismutase in inpatients with chronic schizophrenia. *Journal of Clinical Psychopharmacology* **21**, 85–88.
- Zhang XY, Zhou DF, Zhang PY, Wu GY, et al.** (2001*b*). A double-blind, placebo-controlled trial of extract of Ginkgo biloba added to haloperidol in treatment-resistant patients with schizophrenia. *Journal of Clinical Psychiatry* **62**, 878–883.
- Zhou D, Zhang X, Su J, Nan Z, et al.** (1999). The effects of classic antipsychotic haloperidol plus the extract of ginkgo biloba on superoxide dismutase in patients with chronic refractory schizophrenia. *Chinese Medical Journal* **112**, 1093–1096.
- Zhu Z, Yang J** (2008). Experience of 30 years of clinical use of clozapine in China [in Chinese]. *Journal of Chinese Modern Medicine* **5**, 441–443.
